# Supplementary material for: Synthesis of a One-Dimensional Coordination Polymer of Nickel(II) Complex with a β-Oxodithioester Ligand
Source: Hindawi journal article supplement (doi:10.1155/2017/7623210), 2017-01-01
Supplement: f1 [file 7623210.f1.docx]

**Synthesis of a one-dimensional coordination polymer of nickel(II) complex with a β-oxodithioester ligand.**

RICARDO ROSAS-REYES1, YASMI REYES-ORTEGA2, T. JESUS MORALES-JUAREZ3, VIRGINIA GOMEZ-VIDAL4, IVAN GARCÍA-OROZCO1,*.

1 Laboratorio de investigación y Desarrollo de Materiales Avanzados (LIDMA), Facultad de Química, Universidad Autónoma del Estado de México, Carretera Toluca-Atlacomulco Km 14.5, Unidad San Cayetano, Toluca, Estado de México, México. 2 Centro de Química, ICUAP. Benemérita Universidad Autónoma de Puebla, C. U., 72570, Puebla, Puebla, México. 3 Facultad de Química, Universidad Autónoma del Estado de México, Paseo Colón esq. Paseo Tollocan s/n, 50120, Toluca, México, México. 4 Instituto de Química, Universidad Nacional Autónoma de México, Circuito Interior, Ciudad Universitaria, Coyoacán, 01450, México, D. F., México.

**Supporting material**





**S1**. UV-vis deconvolutioned spectra of **1** in CHCl3 solution.





**S2**. UV-vis deconvolutioned spectra of **2** in CHCl3 solution.


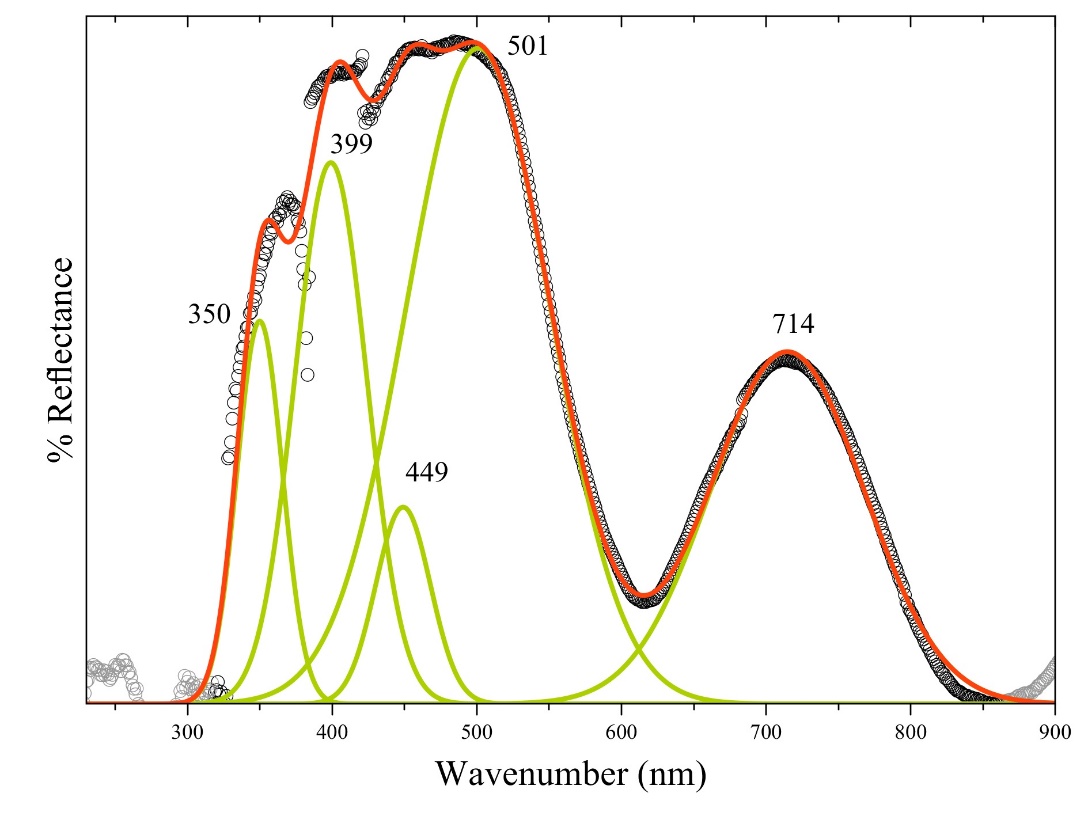


**S3**. DRS deconvolutioned spectra of **1** in solid state up to 900 nm.


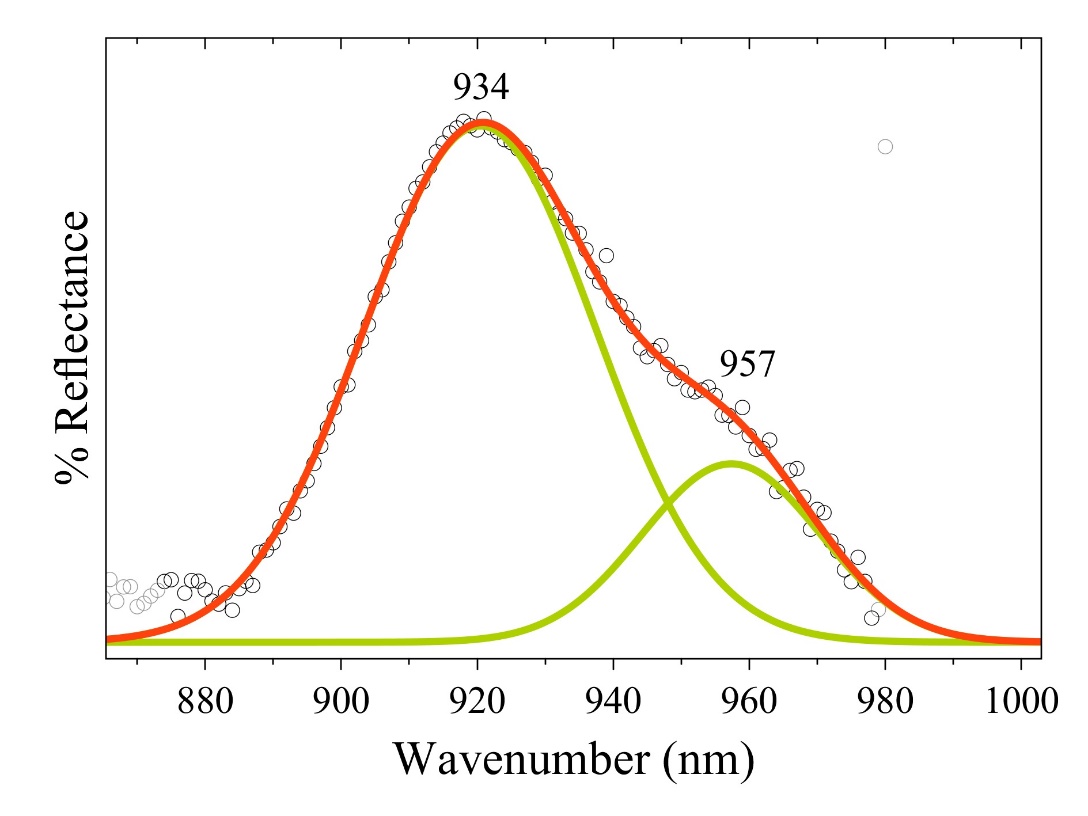


**S4**. DRS deconvolutioned spectra of **1** in solid state from 870to 1000 nm.


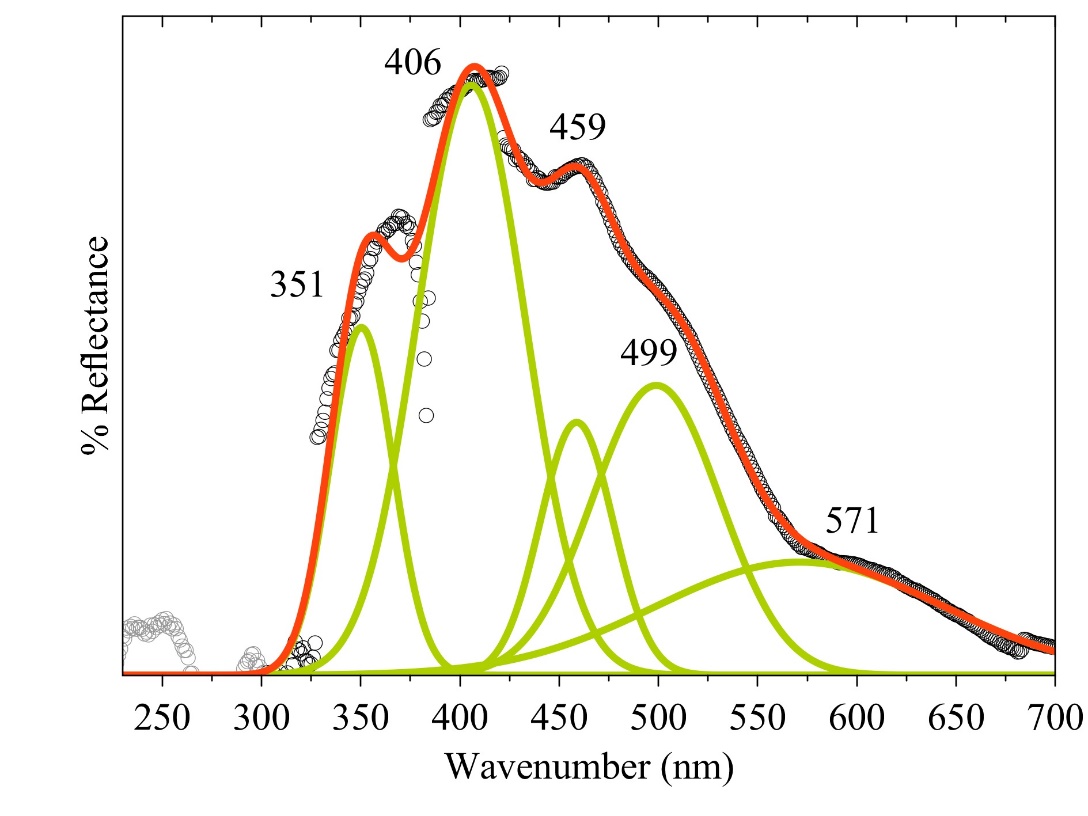


**S5**. DRS deconvolutioned spectra of **2** in solid state up to 700 nm


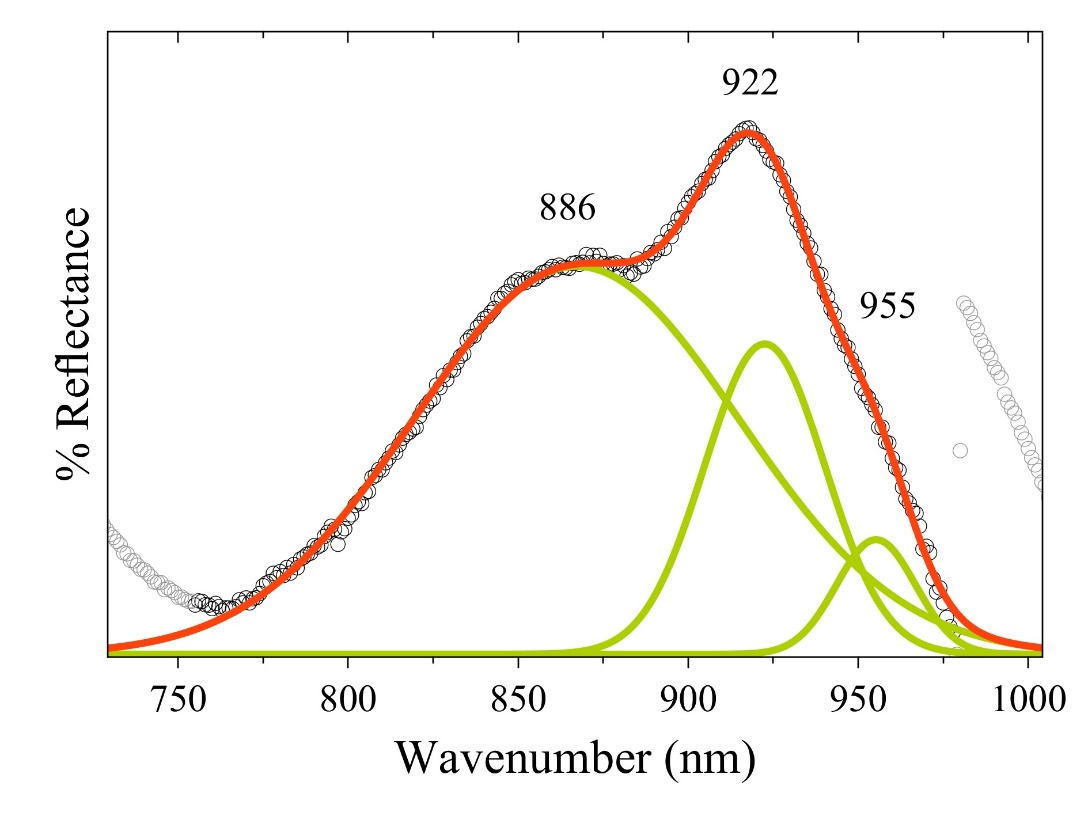


**S6**. DRS deconvolutioned spectra of **2** in solid state from 700 to 1000 nm.
